# Supplementary material
Source: MDPI journal article supplement (https://www.mdpi.com/2071-1050/15/9/7706)
Supplement: s1 [file s1]

## Supporting Information

**Text S1.** HPLC Operation condition: The chromatographic column model is XDB-C18, the mobile phase ratio is 60% methanol and 40% water, the flow rate is 1 mL/min, lasting for 25 min, the column box temperature is 30 °C, and the sample injection volume is 10 µL.

**Text S2.** GC-MS Operation condition: The chromatographic column is DB-5 quartz capillary column (30 mm×0.25 mm×0.25 µm), the carrier is high-purity helium, and the flow rate is 1 mL/min. The temperature rise procedure is as follows: the initial temperature is 40°C, and it is maintained for 3 minutes; increase to 190°C at the rate of 30 °C/min and keep for 5 min; then rise to 250°C at a rate of 30°C/min for 5 min. The temperature of the sample inlet is 240°C, the temperature of the detector is 300°C, the temperature of the ion source is 230°C, the solvent delay is 3 min, and the sample is injected in the split mode (10:1) of 1 µL. The full scan range is 45-600 m/z.

**Table S1.** Basic physical and chemical properties of original soil.

| Index        | Moisture content(%) | Organic Matter(g/kg) | pH        | EC(µS/cm) | Atrazine Content(g/kg) |
|--------------|---------------------|----------------------|-----------|-----------|------------------------|
| Initial Soil | 1.67±0.02           | 3.71±0.14            | 7.73±0.02 | 800±50    | Not Detected           |

**Table S2.** The coverage index of MFC-O, MFC-Control, MFC- Fe<sub>3</sub>O<sub>4</sub>, MFC-MnO<sub>2</sub>.

| Sample   | MFC-O | MFC-Control | MFC- Fe <sub>3</sub> O <sub>4</sub> | MFC-MnO <sub>2</sub> |
|----------|-------|-------------|-------------------------------------|----------------------|
| Coverage | 0.991 | 0.992       | 0.989                               | 0.989                |

**Table S3.** Quality control parameters of Structural equation models.

| Inspection results | Absolute fitness index |       |       | Value added fitness index |       |       | Minimalist Fit Index |       |
|--------------------|------------------------|-------|-------|---------------------------|-------|-------|----------------------|-------|
|                    | X <sup>2</sup> /df     | GFI   | RMSEA | NFI                       | CFI   | IFI   | PCFI                 | PNFI  |
| General standards  | <3                     | 0-1   | <0.1  | 0-1                       | 0-1   | 0-1   | 0-1                  | 0-1   |
| Fitting quantity   | 1.05                   | 0.903 | 0.072 | 0.355                     | 0.719 | 0.846 | 0.632                | 0.226 |

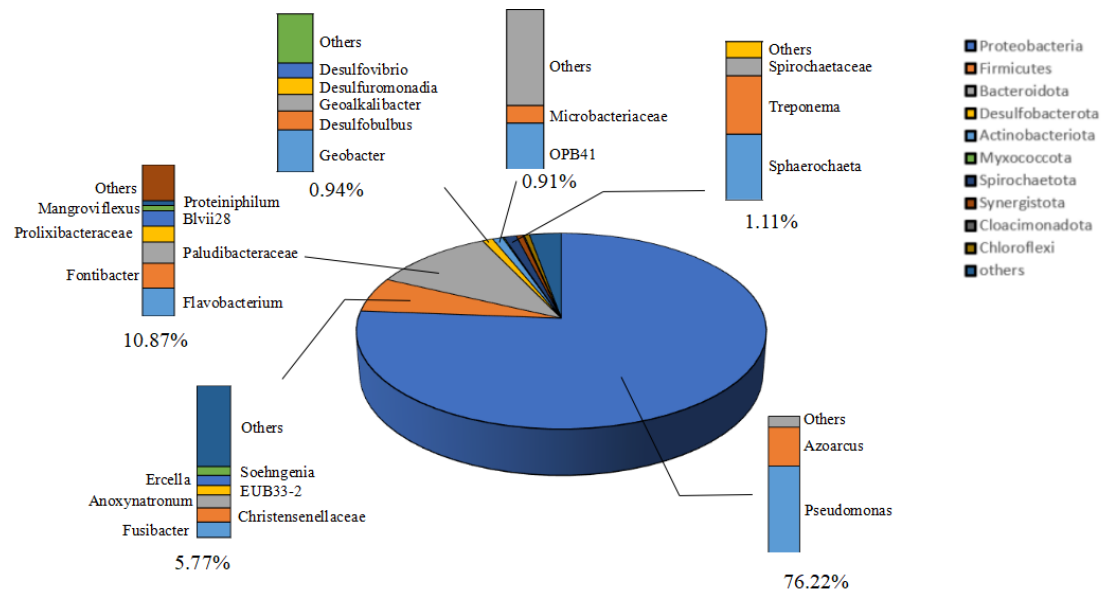

**Figure S1.** Distribution of dominant microorganisms in original soil at phylum and genus levels.
